# Supplementary material for: Route to multicluster containing ancillary ortho-carborane-1,2-dithiolato ligands
Source: Royal Society of Chemistry journal article supplement (doi:10.1039/b505041c), 2005-01-01
Supplement: b505041c.pdf [file b505041c.pdf]

**Supporting information**

**(experimental details, crystal-structure determination )**

**belonging to the publication**

**Route to Multicluster Containing Ancillary  
*ortho*-Carborane-1,2-Dithiolato Ligands**

**Jian-Qiang Wang, Chun-Xia Ren, Guo-Xin Jin\***

*Laboratory of Molecular Catalysis and Innovative Material,  
Department of Chemistry, Fudan University, Shanghai 200433 (P. R.  
China); Fax: (+86)-21-65643776, E-mail: gxjin@fudan.edu.cn*

**General Considerations.** All reactions were carried out under a nitrogen atmosphere using standard Schlenk techniques. Reagent grade solvents, hexane, benzene and ethyl ether were dried over sodium benzophenone ketyl and freshly distilled prior to use.  $\text{CH}_2\text{Cl}_2$ , were refluxed over  $\text{CaH}_2$  for several days and distilled immediately prior to use. All chemicals were purchased from either Aldrich or Sinopharm. Co. and used as received unless otherwise noted.  $\text{Cp}^*\text{Ir}[\text{S}_2\text{C}_2(\text{B}_{10}\text{H}_{10})]_2$  were prepared according to the reported procedures.<sup>1</sup> Infrared spectra were recorded on a Nicolet AVATAR-360IR spectrometer, whereas  $^1\text{H}$  {500MHz},  $^{11}\text{B}$  (160MHz) - NMR spectra were obtained on a Bruker DMX-500 spectrophotometer in  $\text{CDCl}_3$ , respectively. Elemental analyses were performed on Elementar vario EI Analyzer. UV/vis spectra were obtained on a HP 8453 spectrophotometer in  $\text{CDCl}_3$  and fluorescence spectra were performed on a Varian Cary Eclipse spectrophotometer.

### **Crystal Structure Determinations of 2, 3, 5**

Crystallographic data for 2, 3 and 5 are summarized in Table S1, S2, S3. Each crystal was mounted on glass fiber or sealed in glass tube. Crystallographic measurements were made on a Bruker Smart Apex 1000 CCD area detector using graphite monochromated  $\text{MoK}\alpha$  radiation ( $\lambda = 0.71073\text{\AA}$ ) at 293K. Empirical absorption corrections were applied using the program SADABS. The structures were solved by directed methods (SHELXS-97, G. M. Sheldrick, SHELXL-97, Universität Göttingen 1997) and refined on  $F^2$  by full-matrix least squares (SHELX-97, G. M. Sheldrick, SHELXL-97, Universität Göttingen 1997) using all unique data. All non-hydrogen atoms were refined anisotropically. The hydrogen atoms were included in the calculated positions.

**Table S1.** Crystal data and structure refinement for **2**

|                                   |                                                                                |          |  |
|-----------------------------------|--------------------------------------------------------------------------------|----------|--|
| Empirical formula                 | C <sub>48</sub> H <sub>57</sub> Cl <sub>6</sub> Ir <sub>3</sub> N <sub>6</sub> |          |  |
| Formula weight                    | 1507.30                                                                        |          |  |
| Crystal system                    | Trigonal                                                                       |          |  |
| space group                       | R3m                                                                            |          |  |
| Temperature                       | 293(2) K                                                                       |          |  |
| Wavelength                        | 0.71073 Å                                                                      |          |  |
| Unit cell dimensions              | a = 24.096(7)Å                                                                 | α = 90°  |  |
|                                   | b = 24.096(7)Å                                                                 | β = 90°  |  |
|                                   | c = 7.479(3) Å                                                                 | γ = 120° |  |
| Volume                            | 3761(2) Å <sup>3</sup>                                                         |          |  |
| Z                                 | 3                                                                              |          |  |
| Calculated density                | 1.997 Mg/m <sup>3</sup>                                                        |          |  |
| Absorption coefficient            | 8.302 mm <sup>-1</sup>                                                         |          |  |
| F(000)                            | 2160                                                                           |          |  |
| Crystal size                      | 0.10 × 0.05 × 0.05 mm                                                          |          |  |
| Theta range for data collection   | 1.69 to 25.01 °                                                                |          |  |
| Limiting indices                  | -28 ≤ h ≤ 28, -24 ≤ k ≤ 28, -8 ≤ l ≤ 8                                         |          |  |
| Reflections collected / unique    | 5271 / 1572 [R(int) = 0.1157]                                                  |          |  |
| Completeness to theta = 25.01     | 100.0 %                                                                        |          |  |
| Absorption correction             | Multi-scan                                                                     |          |  |
| Max. and min. transmission        | 0.6816 and 0.4907                                                              |          |  |
| Refinement method                 | Full-matrix least-squares on F <sup>2</sup>                                    |          |  |
| Data / restraints / parameters    | 1572 / 25 / 106                                                                |          |  |
| Goodness-of-fit on F <sup>2</sup> | 0.900                                                                          |          |  |
| Final R indices [I > 2σ(I)]       | R1 = 0.0535, wR2 = 0.0975                                                      |          |  |
| R indices (all data)              | R1 = 0.0866, wR2 = 0.1041                                                      |          |  |
| Largest diff. peak and hole       | 1.914 and -0.899e·A <sup>-3</sup>                                              |          |  |

**Table S2.** Crystal data and structure refinement for **3**

|                                   |                                                                                               |          |  |
|-----------------------------------|-----------------------------------------------------------------------------------------------|----------|--|
| Empirical formula                 | C <sub>54</sub> H <sub>87</sub> B <sub>30</sub> Ir <sub>3</sub> N <sub>6</sub> S <sub>6</sub> |          |  |
| Formula weight                    | 1913.56                                                                                       |          |  |
| Crystal system                    | Tetragonal                                                                                    |          |  |
| space group                       | P4(2)/ncm                                                                                     |          |  |
| Temperature                       | 293(2) K                                                                                      |          |  |
| Wavelength                        | 0.71073 Å                                                                                     |          |  |
| Unit cell dimensions              | a = 35.258(6) Å                                                                               | α = 90 ° |  |
|                                   | b = 35.258(6) Å                                                                               | β = 90 ° |  |
|                                   | c = 16.150(4) Å                                                                               | γ = 90 ° |  |
| Volume                            | 20076(6) Å <sup>3</sup>                                                                       |          |  |
| Z                                 | 8                                                                                             |          |  |
| Calculated density                | 1.266 Mg/m <sup>3</sup>                                                                       |          |  |
| Absorption coefficient            | 4.124 mm <sup>-1</sup>                                                                        |          |  |
| F(000)                            | 7440                                                                                          |          |  |
| Crystal size                      | 0.20 × 0.10 × 0.08 mm                                                                         |          |  |
| Theta range for data collection   | 0.82 to 25.01 °                                                                               |          |  |
| Limiting indices                  | -41 ≤ h ≤ 41, -41 ≤ k ≤ 41, -15 ≤ l ≤ 19                                                      |          |  |
| Reflections collected / unique    | 81696 / 9083 [R(int) = 0.1202]                                                                |          |  |
| Completeness to theta = 25.01     | 100.0 %                                                                                       |          |  |
| Absorption correction             | Semi-empirical from equivalents                                                               |          |  |
| Max. and min. transmission        | 0.7338 and 0.4926                                                                             |          |  |
| Refinement method                 | Full-matrix least-squares on F <sup>2</sup>                                                   |          |  |
| Data / restraints / parameters    | 9083 / 18 / 474                                                                               |          |  |
| Goodness-of-fit on F <sup>2</sup> | 1.151                                                                                         |          |  |
| Final R indices [I > 2σ(I)]       | R <sub>1</sub> = 0.0704, wR <sub>2</sub> = 0.1930                                             |          |  |
| R indices (all data)              | R <sub>1</sub> = 0.1090, wR <sub>2</sub> = 0.2177                                             |          |  |
| Largest diff. peak and hole       | 1.267 and -0.851 e·Å <sup>-3</sup>                                                            |          |  |

**Table S1.** Crystal data and structure refinement for **5**

|                                   |                                                                                                                                               |
|-----------------------------------|-----------------------------------------------------------------------------------------------------------------------------------------------|
| Empirical formula                 | $C_{36}H_{62}B_{20}Cl_4Ir_2N_2S_4$                                                                                                            |
| Formula weight                    | 1393.52                                                                                                                                       |
| Crystal system                    | Triclinic                                                                                                                                     |
| space group                       | P-1                                                                                                                                           |
| Temperature                       | 293(2) K                                                                                                                                      |
| Wavelength                        | 0.71073 Å                                                                                                                                     |
| Unit cell dimensions              | $a = 10.223(2)$ Å $\alpha = 101.052(2)^\circ$<br>$b = 11.336(2)$ Å $\beta = 109.107(3)^\circ$<br>$c = 13.688(3)$ Å $\gamma = 94.826(3)^\circ$ |
| Volume                            | 1452.6(5) Å <sup>3</sup>                                                                                                                      |
| Z                                 | 1                                                                                                                                             |
| Calculated density                | 1.593 Mg/m <sup>3</sup>                                                                                                                       |
| Absorption coefficient            | 4.933 mm <sup>-1</sup>                                                                                                                        |
| F(000)                            | 678                                                                                                                                           |
| Crystal size                      | 0.50 × 0.20 × 0.10 mm                                                                                                                         |
| Theta range for data collection   | 1.62 to 25.01 °                                                                                                                               |
| Limiting indices                  | -9 ≤ h ≤ 12, -13 ≤ k ≤ 13, -16 ≤ l ≤ 16                                                                                                       |
| Reflections collected / unique    | 6144 / 5042 [R(int) = 0.0154]                                                                                                                 |
| Completeness to theta = 25.01     | 98.5 %                                                                                                                                        |
| Absorption correction             | Semi-empirical from equivalents                                                                                                               |
| Max. and min. transmission        | 0.6382 and 0.1917                                                                                                                             |
| Refinement method                 | Full-matrix least-squares on F <sup>2</sup>                                                                                                   |
| Data / restraints / parameters    | 5042 / 18 / 317                                                                                                                               |
| Goodness-of-fit on F <sup>2</sup> | 1.086                                                                                                                                         |
| Final R indices [I > 2σ(I)]       | R1 = 0.0322, wR2 = 0.0904                                                                                                                     |
| R indices (all data)              | R1 = 0.0346, wR2 = 0.0920                                                                                                                     |
| Largest diff. peak and hole       | 1.480 and -1.329 e·Å <sup>-3</sup>                                                                                                            |

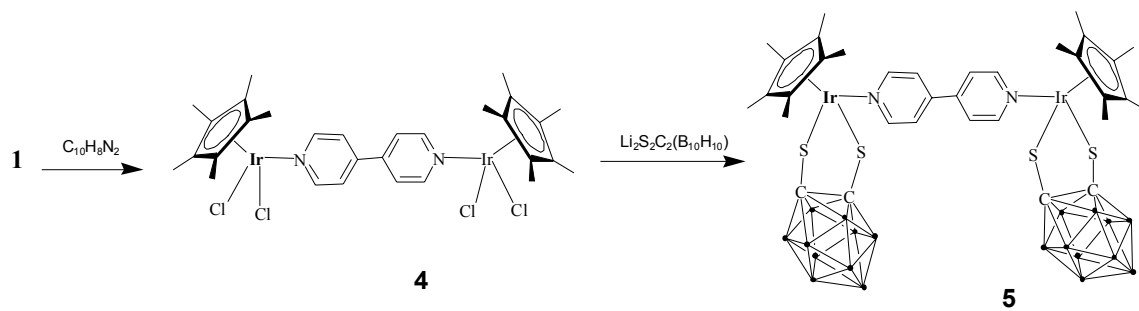

Scheme S1 Prepare of **4**, **5**

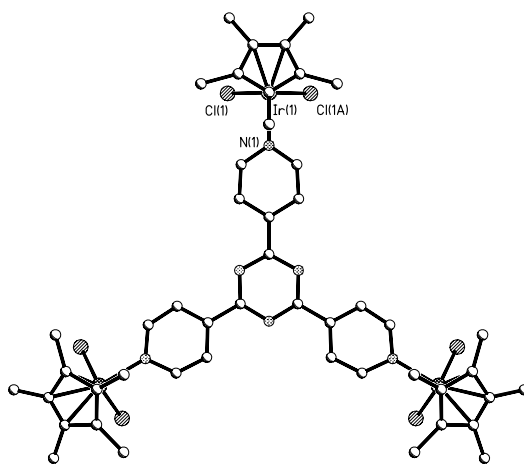

(a)

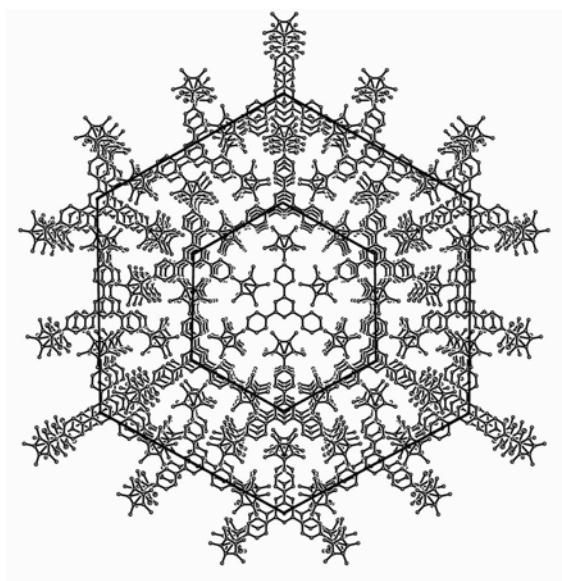

(b)

Fig. S1 (a) Molecular structure of **2**. (b) Crystal packing representation of **2**

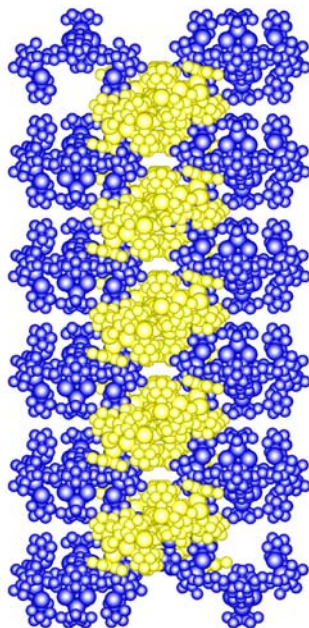

Fig. S2 Crystal structures of **3**, viewed along the *c* axis.

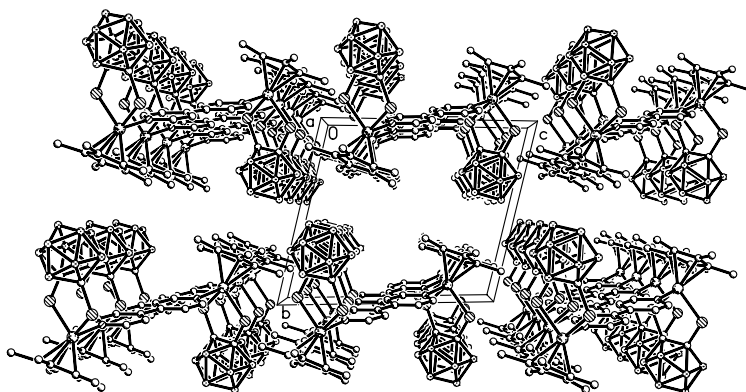

Fig. S3 Crystal packing representation of **5**.

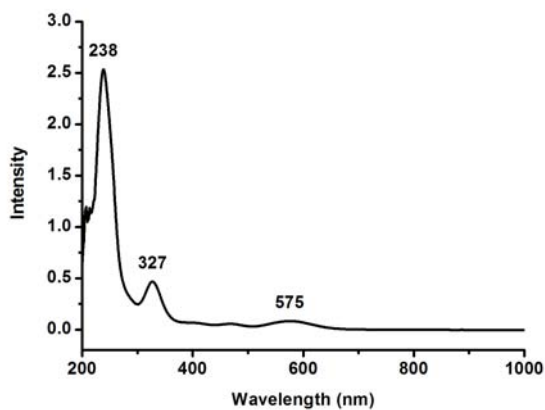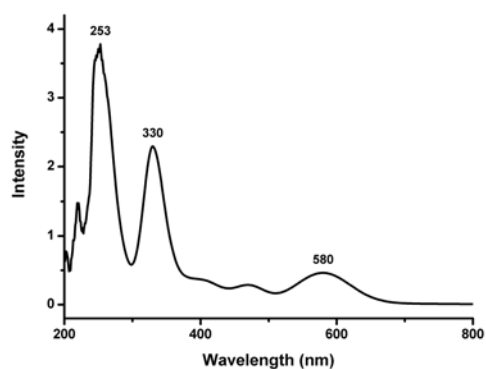

Fig. S5 (a) Absorption spectra of **3** in CH<sub>2</sub>Cl<sub>2</sub> ( $1.0 \times 10^{-3}$  mmol), (b) absorption spectra of **5** in CH<sub>2</sub>Cl<sub>2</sub> ( $1.5 \times 10^{-3}$  mmol)

#### Reference

- (a) M. Herberhold, G.-X. Jin, H. Yan, W. Milius, B. Wrackmeyer, *J. Organomet. Chem.*, 1999, **587**, 252; (b) M. Herberhold, G.-X. Jin, H. Yan, W. Milius, B. Wrackmeyer, *Eur. J. Inorg. Chem.*, 1999, 873; (c) X.-F. Hou, X.-C. Wang; J.-Q. Wang; G.-X. Jin, *J. Organomet. Chem.*, 2004, **689**, 2228; (d) Q. Kong, G.-X. Jin, S.-Y. Cai, L.-H. Weng, *Chin. Sci. Bull.*, 2003, **48**, 1733.
